# Supplementary material for: A highly aluminum-doped β-isomer Keggin-type tungstoaluminate
Source: Royal Society of Chemistry journal article supplement (doi:10.1039/c6dt02618d), 2016-01-01
Supplement: c6dt02618d1.pdf [file c6dt02618d1.pdf]

## Supporting materials:

### 1. General methods

All reagents were purchased and used without further purification. Elemental analysis (C, H, N) was carried on a Perkin-Elmer 2400CHN elemental analyzer. The metal atom analysis (W, Al) was carried on an X Series 2 ICP-MS. Powder X-ray diffraction (XRD) was determined by a Bruker AXS D8 Advance diffractometer. FTIR spectra were recorded in KBr pellets with a FTIR-8900 IR spectrometer in the range of 400–4000  $\text{cm}^{-1}$ . TG-DSC analysis was performed on a Perkin-Elmer Pyris Diamond TG/DTA instrument in a flow of  $\text{N}_2$  with a heating rate of 10  $^\circ\text{C min}^{-1}$ .

### 2. X-ray crystallography

Single crystal of compound **1** was selected for data collection performed on a Smart Apex CCD diffractometer at 296(2) K with Mo Ka monochromated radiation ( $\lambda = 0.71073 \text{ \AA}$ ). The structure of **1** was solved by a direct method and refined by the full-matrix least squares methods on  $F^2$  using the SHELXTL crystallographic software package. (G. M. Sheldrick, *SHELXL-97, Program for refinement of crystal structures*, University of Göttingen, Germany, 1997; G. M. Sheldrick, *SHELXS-97, Program for solution of crystal structures*, University of Göttingen, Germany, 1997.) Anisotropic thermal parameters were used to refine all non-hydrogen atoms. No hydrogen atoms of organic cation, monoprotonated -OH and solvent water molecules, were included in the final structure according to the disorder and the weak diffraction, but they were included in the total molecular formula. Hydrogen atoms of the coordinated water molecules were added from the Fourier map and fixed. All the refinement details for the compound **1** were given in Table S1-S2. The CCDC reference number is 1489188. These data can be obtained free of charge at [www.ccdc.cam.ac.uk/conts/retrieving.html](http://www.ccdc.cam.ac.uk/conts/retrieving.html) (or from the Cambridge Crystallographic Data Centre, 12, Union Road, Cambridge CB2 1EZ, UK; fax: +44-1223/336-033; e-mail: [deposit@ccdc.cam.ac.uk](mailto:deposit@ccdc.cam.ac.uk)).

Table S1 Crystal data and structure refinement details for compound 1.

|                                                    |                                                                                                    |
|----------------------------------------------------|----------------------------------------------------------------------------------------------------|
| Empirical formula                                  | C <sub>12</sub> H <sub>26</sub> Al <sub>4.50</sub> W <sub>8.5</sub> N <sub>2</sub> O <sub>44</sub> |
| Formula weight                                     | 2586.48                                                                                            |
| Crystal system                                     | Monoclinic                                                                                         |
| Space group                                        | <i>P2(1)/m</i>                                                                                     |
| <i>a</i> / Å                                       | 10.005(4)                                                                                          |
| <i>b</i> / Å                                       | 14.757(5)                                                                                          |
| <i>c</i> / Å                                       | 17.197(6)                                                                                          |
| $\alpha$ /°                                        | 90                                                                                                 |
| $\beta$ /°                                         | 100.266(5)                                                                                         |
| $\gamma$ /°                                        | 90                                                                                                 |
| Volume/ Å <sup>3</sup>                             | 2498.5(15)                                                                                         |
| <i>Z</i>                                           | 2                                                                                                  |
| <i>F</i> (000)                                     | 2303                                                                                               |
| Density(calculated)/(Mg·m <sup>-3</sup> )          | 3.438                                                                                              |
| $\theta$ (°)                                       | 1.83 to 25.01°                                                                                     |
| Absorption coefficient/(mm <sup>-1</sup> )         | 19.672                                                                                             |
| Index range                                        | -11≤ <i>h</i> ≤11, -14≤ <i>k</i> ≤17, -17≤ <i>l</i> ≤20                                            |
| Reflections collected                              | 11985                                                                                              |
| Independent reflections/ <i>R</i> <sub>(int)</sub> | 4568(0.0364)                                                                                       |
| Completeness                                       | 99.6                                                                                               |
| Absorption correction(%)                           | Semi-empirical                                                                                     |
| Max. and min. transmission                         | 0.078 and 0.041                                                                                    |
| Data / restraints / parameters                     | 4568 / 744 / 375                                                                                   |
| Goodness-of-fit on <i>F</i> <sup>2</sup>           | 1.043                                                                                              |
| Final <i>R</i> indices [ <i>I</i> >2σ( <i>I</i> )] | <i>R</i> <sub>1</sub> = 0.0404, <i>wR</i> <sub>2</sub> = 0.1111                                    |
| <i>R</i> indices (all data)                        | <i>R</i> <sub>1</sub> = 0.0444, <i>wR</i> <sub>2</sub> = 0.1141                                    |

Table S2 Selected bond lengths [Å] for compound **1**.

|                         |          |                               |           |                           |           |
|-------------------------|----------|-------------------------------|-----------|---------------------------|-----------|
| W(1)-O(13)              | 1.736(8) | W(3)-O(3) <sup>#1</sup>       | 2.269(8)  | Al(1)-O(3) <sup>#1</sup>  | 1.780(8)  |
| W(1)-O(15)              | 1.814(8) | W(4)-O(23)                    | 1.730(9)  | Al(1)-O(3)                | 1.780(8)  |
| W(1)-O(22)              | 1.935(4) | W(4)-O(24')                   | 1.915(10) | Al(1)-O(11)               | 1.790(11) |
| W(1)-O(16)              | 1.986(8) | W(4)-O(7)                     | 1.928(7)  | Al(2)-O(17)               | 1.870(8)  |
| W(1)-O(10)              | 2.049(8) | W(4)-O(9)                     | 1.931(8)  | Al(2)-O(8) <sup>#1</sup>  | 1.891(9)  |
| W(1)-O(3) <sup>#1</sup> | 2.253(7) | W(4)-O(6)                     | 1.954(15) | Al(2)-O(19)               | 1.904(8)  |
| W(2)-O(18)              | 1.739(9) | W(4)-O(24)                    | 1.971(11) | Al(2)-O(4)                | 1.905(8)  |
| W(2)-O(10)              | 1.926(9) | W(4)-O(6')                    | 2.010(15) | Al(2)-O(5)                | 1.936(8)  |
| W(2)-O(1)               | 1.939(2) | W(4)-O(2)                     | 2.311(7)  | Al(2)-O(11)               | 2.008(8)  |
| W(2)-O(14)              | 1.951(8) | W(5)Al(5)-O(20)               | 1.687(13) | Al(2)-Al(2) <sup>#1</sup> | 2.967(7)  |
| W(2)-O(7)               | 1.969(8) | W(5)Al(5)-O(6) <sup>#1</sup>  | 1.938(15) | Al(3)-O(21)               | 1.895(12) |
| W(2)-O(3) <sup>#1</sup> | 2.282(7) | W(5)Al(5)-O(6)                | 1.938(15) | Al(3)-O(15)               | 1.904(9)  |
| W(3)-O(12)              | 1.750(9) | W(5)Al(5)-O(19) <sup>#1</sup> | 1.954(8)  | Al(3)-O(15) <sup>#1</sup> | 1.904(9)  |
| W(3)-O(8)               | 1.809(8) | W(5)Al(5)-O(19)               | 1.954(8)  | Al(3)-O(5)                | 1.903(8)  |
| W(3)-O(16)              | 1.944(8) | W(5)Al(5)-O(2)                | 2.237(11) | Al(3)-O(5) <sup>#1</sup>  | 1.903(8)  |
| W(3)-O(9)               | 1.951(8) | Al(1)-O(2)                    | 1.763(11) | Al(3)-O(11)               | 2.008(11) |
| W(3)-O(14)              | 2.082(8) |                               |           |                           |           |

*symmetry code: #1 =x,-y+3/2,z*

Table S3. The BVS results for atoms in crystal **1**.

|    |       |         |       |     |       |
|----|-------|---------|-------|-----|-------|
| W1 | 5.901 | W5(Al5) | 6.047 |     |       |
| W2 | 5.752 | Al1     | 2.837 |     |       |
| W3 | 5.840 | Al2     | 2.928 |     |       |
| W4 | 5.767 | Al3     | 2.920 |     |       |
| O1 | 1.906 | O9      | 1.895 | O17 | 0.553 |
| O2 | 1.862 | O10     | 1.694 | O18 | 1.635 |
| O3 | 1.880 | O11     | 1.830 | O19 | 1.420 |
| O4 | 1.006 | O12     | 1.588 | O20 | 1.882 |
| O5 | 0.969 | O13     | 1.649 | O21 | 0.517 |
| O6 | 1.870 | O14     | 1.569 | O22 | 1.926 |
| O7 | 1.860 | O15     | 1.840 | O23 | 1.676 |
| O8 | 1.876 | O16     | 1.779 | O24 | 1.748 |

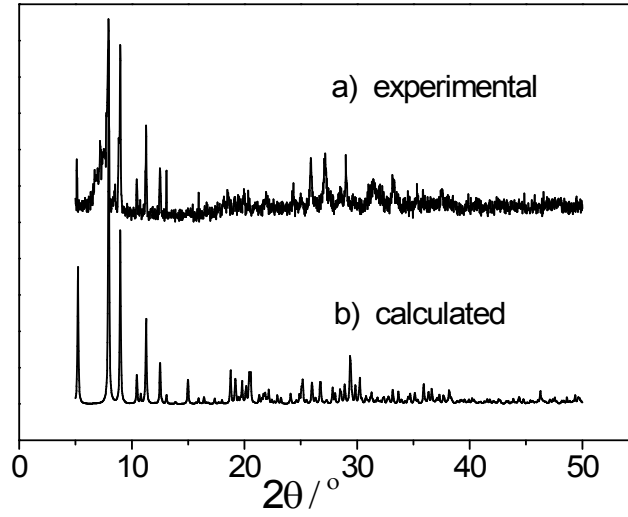

Figure S1. The experimental and calculated XRD patterns for crystal **1**.

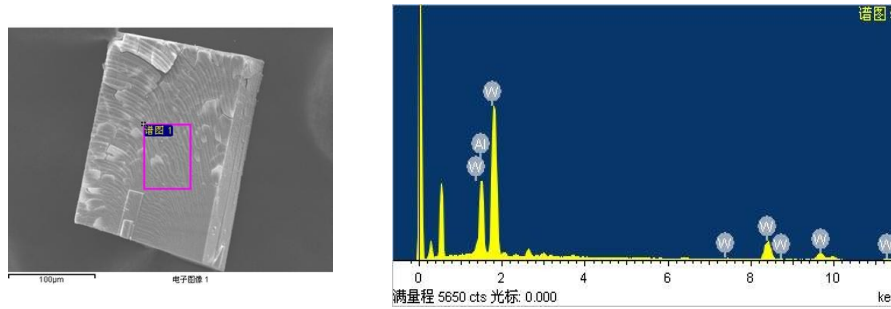

Al:W  $\approx$  4.5:8.5

Figure S2. EDS (energy dispersive X-ray spectroscopy) for **1**.

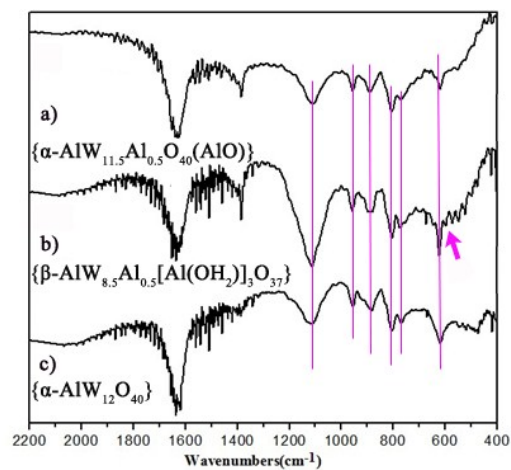

Figure S3. IR spectra showing the polyanionic structures: a)  $(\text{H}_2\text{bpe})_3[\alpha\text{-AlW}_{11.5}\text{Al}_{0.5}\text{O}_{40}(\text{AlO})] \cdot 2\text{H}_2\text{O}$ ; b) crystal **1**; c)  $(\text{H}_2\text{bpe})_{2.5}[\alpha\text{-AlW}_{12}\text{O}_{40}] \cdot 4\text{H}_2\text{O}$ .
